# Supplementary material
Source: ML conference proceedings conference paper supplement (https://www.ecva.net/papers/eccv_2020/papers_ECCV/html/123520732_ECCV_2020_paper.php)
Supplement: Supplementary file 3 [file 123520732-supp.zip]

Archive with 6 entries (5 files):
- 0397-supp.pdf
- __MACOSX/._0397-supp.pdf
- video/
- video/Qualitative result.mp4
- __MACOSX/video/._Qualitative result.mp4
- video/README
