# Supplementary material
Source: ML conference proceedings conference paper supplement (https://www.ecva.net/papers/eccv_2020/papers_ECCV/html/123520732_ECCV_2020_paper.php)
Supplement: Supplementary file 3 [file 123520732-supp.zip › video/README]

Qualitative result: Qualitative result of I2L-MeshNet on 3DPW
